# Supplementary material for: Preparation of Novel Pyrazolo[4,3-e]tetrazolo[1,5-b][1,2,4]triazine Sulfonamides and Their Experimental and Computational Biological Studies
Source: MDPI journal article supplement (doi:10.3390/ijms23115892), 2022-05-24
Supplement: s1 [file s1]

A)

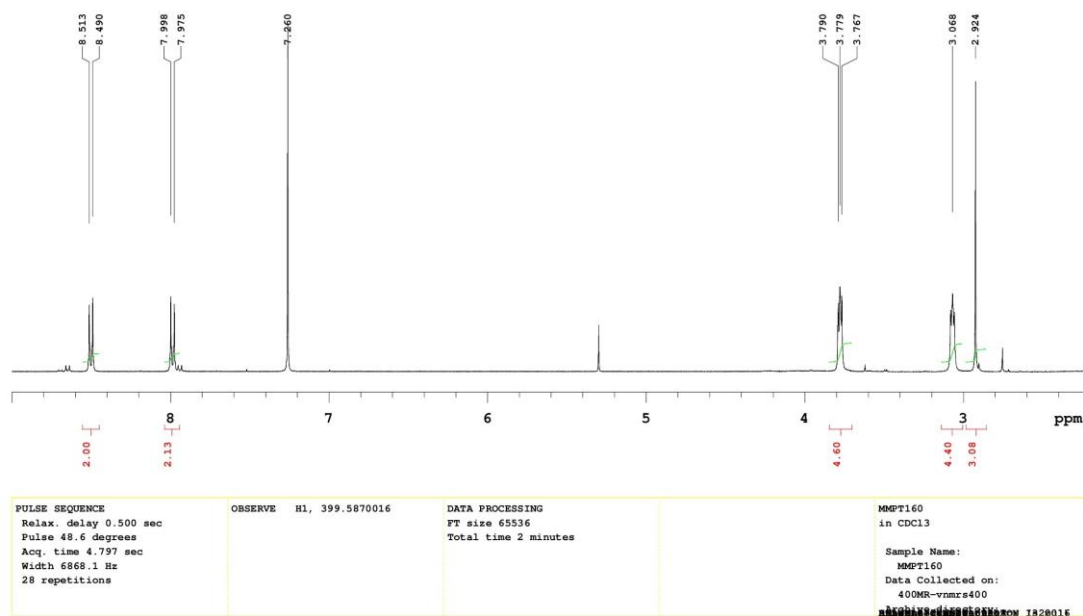

B)

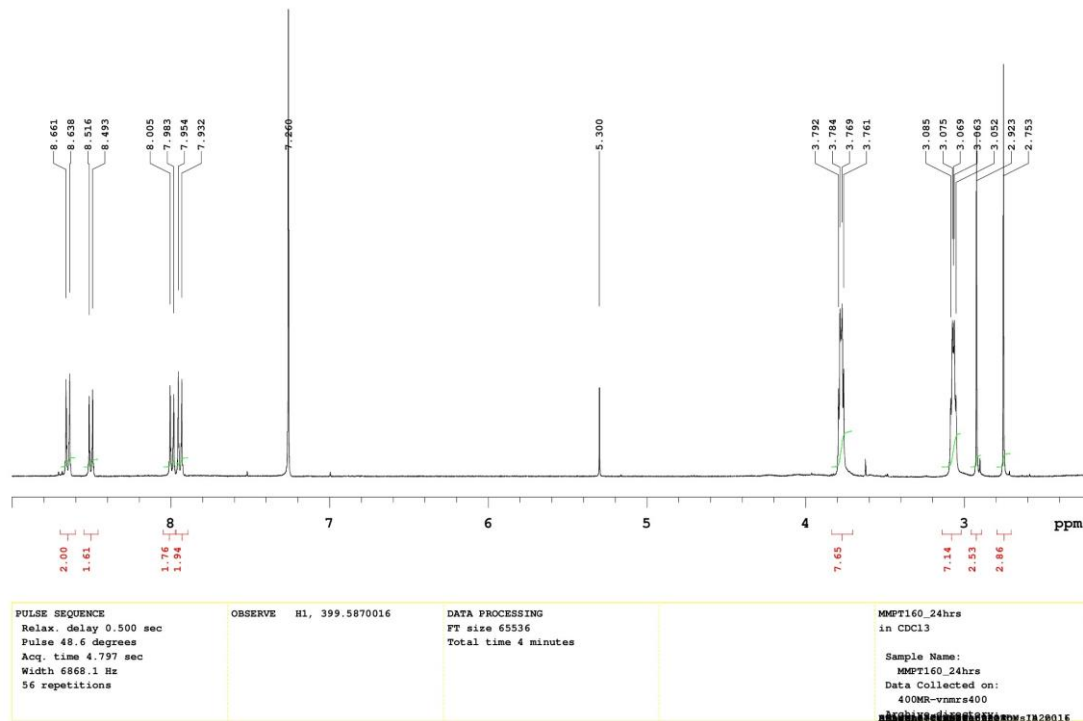

C)

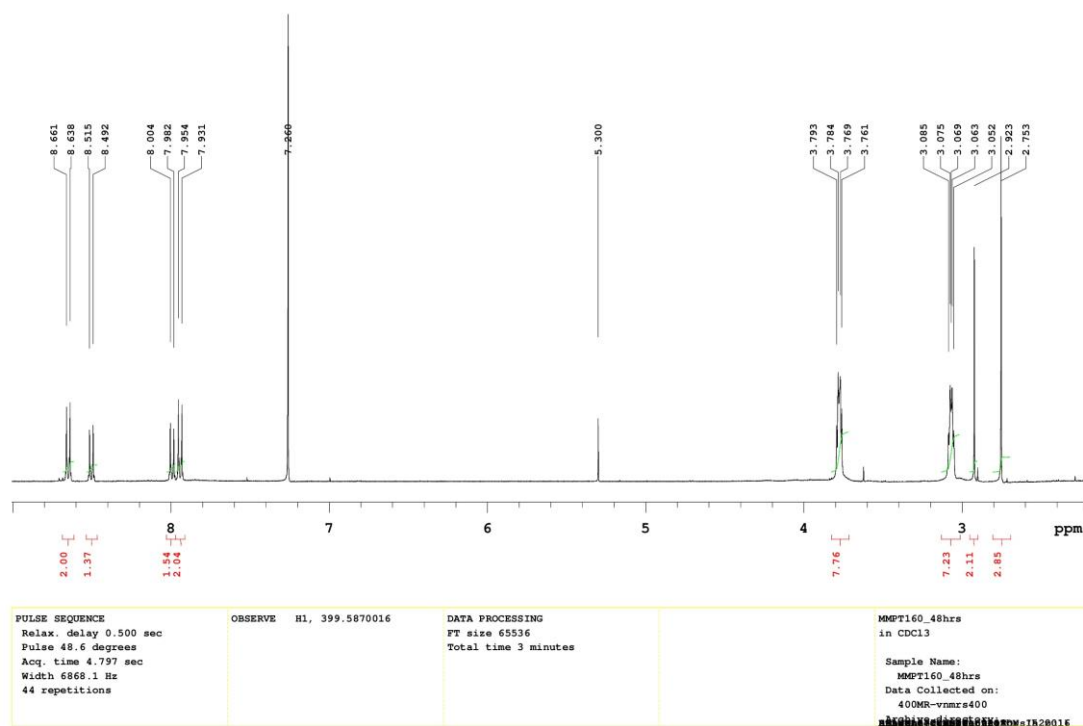

**Supplementary material Figure S1:** The  $^1\text{H}$  NMR spectrum (A) recorded immediately after solution of the compound **MM134** in deuterated chloroform and repeated (B) after 24 h and (C) after 48 h.

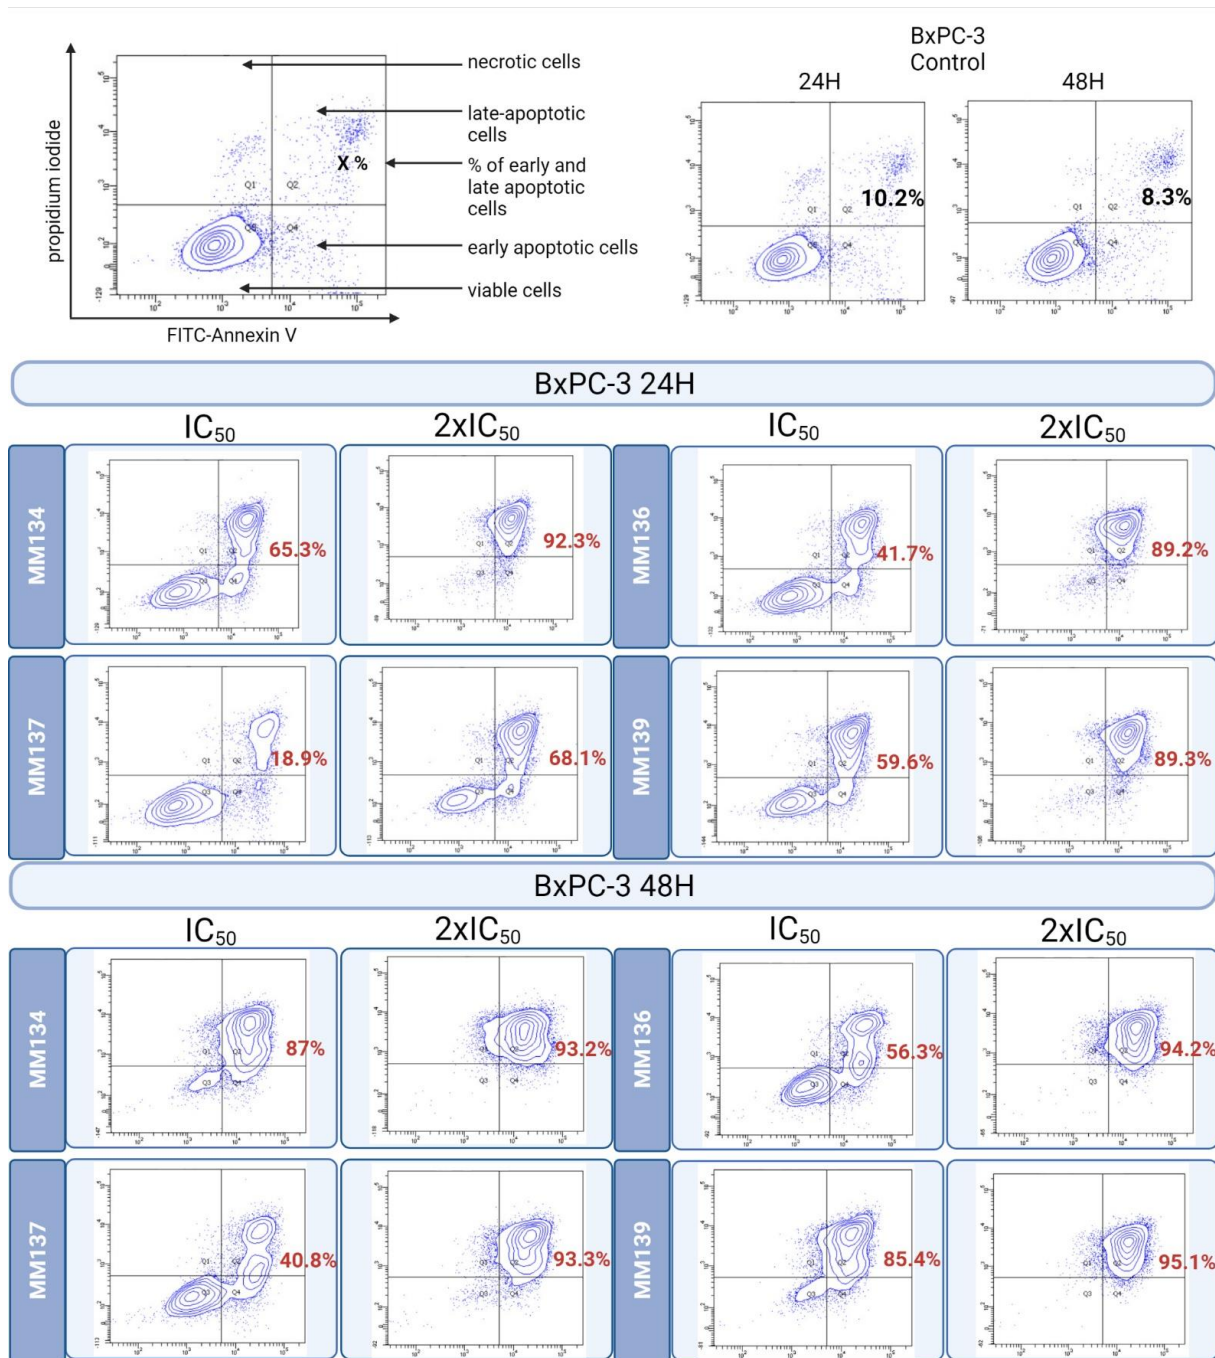

**Supplementary material Figure S2:** Apoptosis detection by flow cytometry with Annexin V-FITC staining in BxPC-3 cells exposed to IC<sub>50</sub> and 2xIC<sub>50</sub> concentrations of **MM134**, **-6**, **-7**, and **-9** for 24 and 48-h. Left bottom square represents live cells, right bottom early apoptotic cells, the top left square necrotic cells, and top right late apoptotic cells.

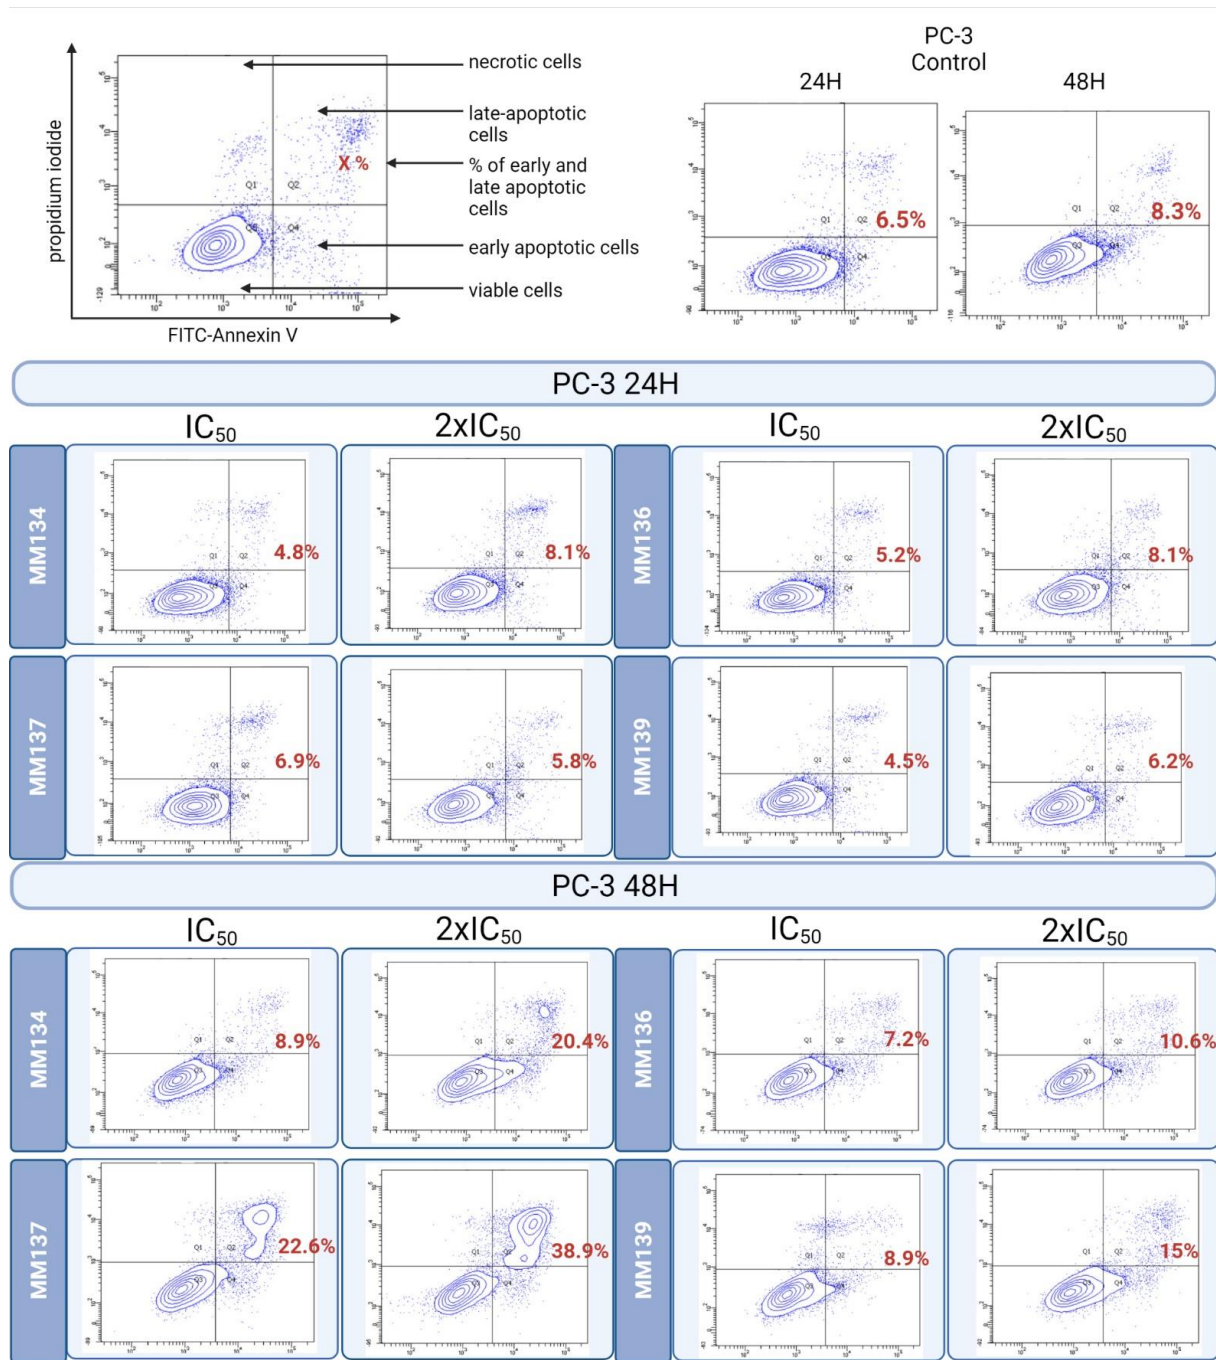

**Supplementary material Figure S3:** Apoptosis detection by flow cytometry with Annexin V-FITC staining in PC-3 cells exposed to IC<sub>50</sub> and 2xIC<sub>50</sub> concentrations of **MM134**, **-6**, **-7**, and **-9** for 24 and 48-h. Left bottom square represents live cells, right bottom early apoptotic cells, the top left square necrotic cells, and top right late apoptotic cells.
